# Supplementary material for: Co-doping of Sb 3+ /Ln 3+ in the Cs 2 NaGdCl 6 perovskite leads to efficient energy transfer and single-host white light emission
Source: Royal Society of Chemistry journal article supplement (doi:10.1039/d4tc02729a), 2024-01-01
Supplement: d4tc02729a1.pdf [file d4tc02729a1.pdf]

## Supporting Information

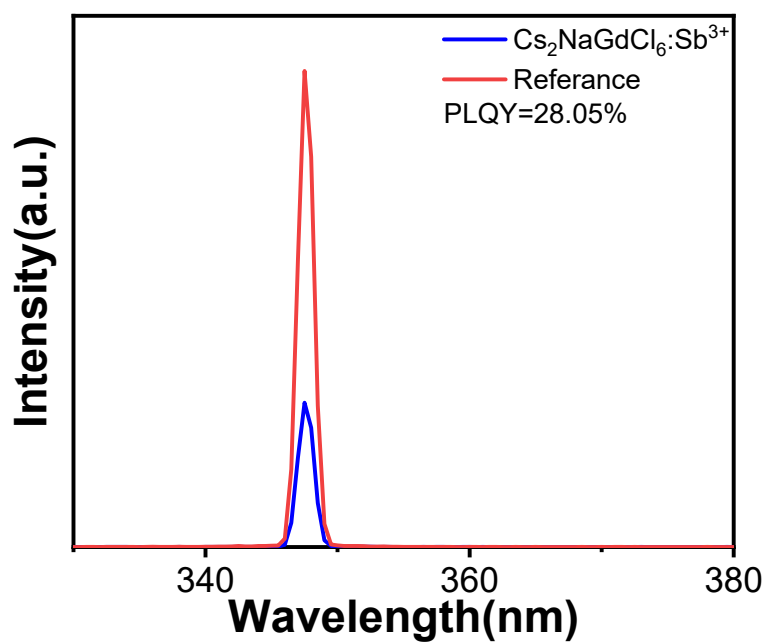

Figure S1. PLQY of  $\text{Cs}_2\text{NaGdCl}_6:4\%\text{Sb}^{3+}$ .

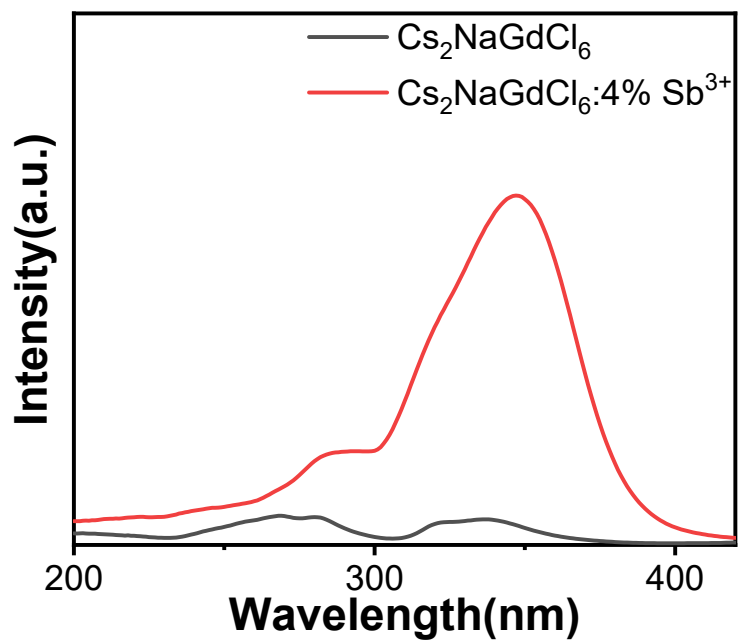

Figure S2. PLE spectra of Cs<sub>2</sub>NaGdCl<sub>6</sub> doped Sb<sup>3+</sup> and undoped Sb<sup>3+</sup> under 445 nm excitation.

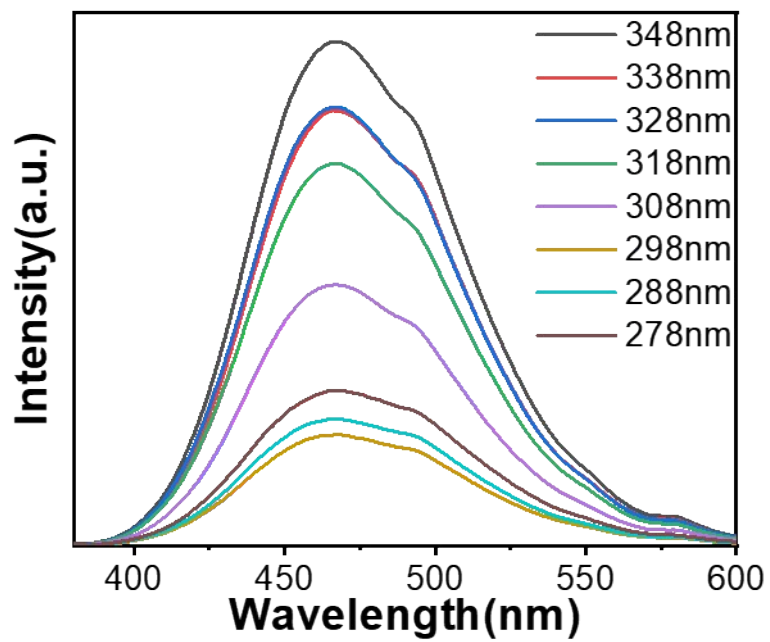

Figure S3. The emission spectra of Cs<sub>2</sub>NaGdCl<sub>6</sub>: 4%Sb<sup>3+</sup> at different excitation wavelengths.

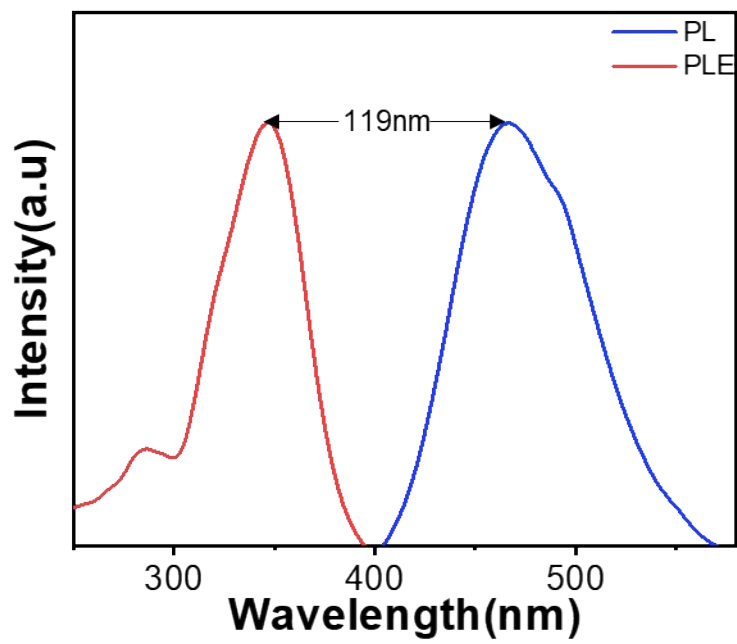

Figure S4. PL and PLE spectra of Cs<sub>2</sub>NaGdCl<sub>6</sub>: 4%Sb<sup>3+</sup>.

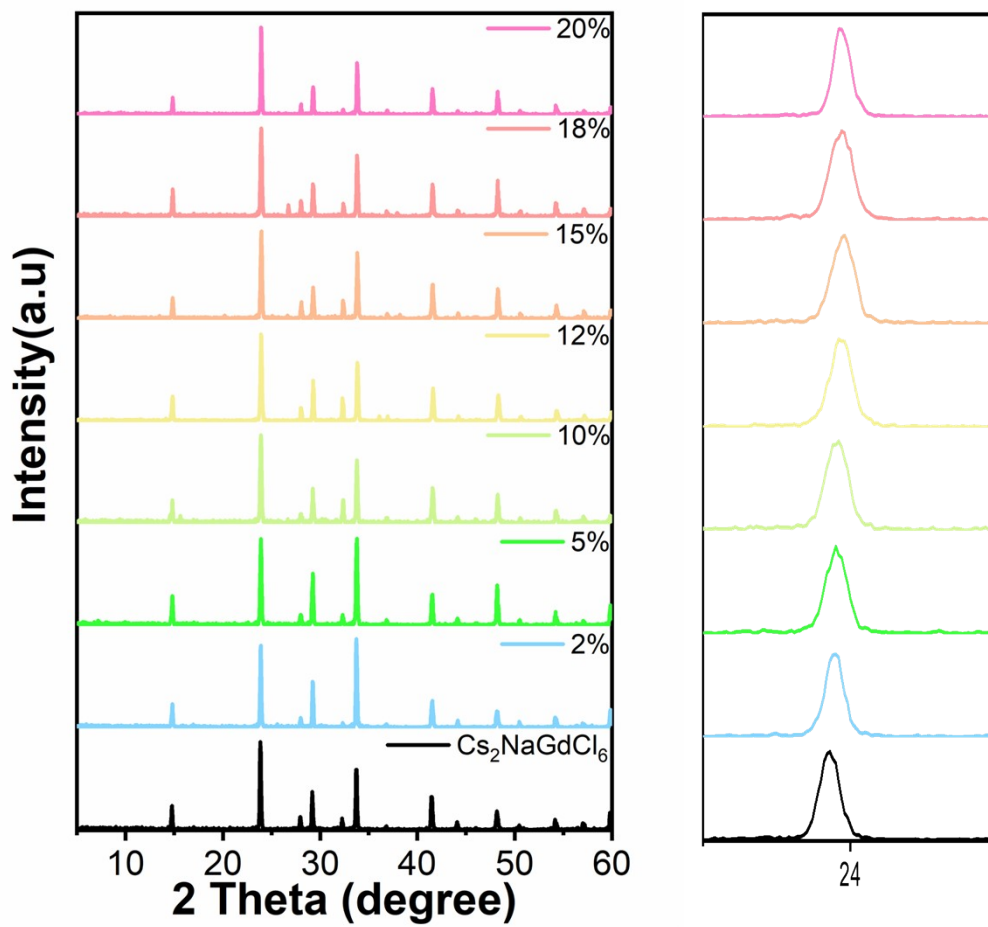

Figure S5. shows the XRD plots of  $\text{Cs}_2\text{NaGdCl}_6$  doped with different  $\text{Tb}^{3+}$  concentrations as well as the strongest XRD peaks of the magnified.

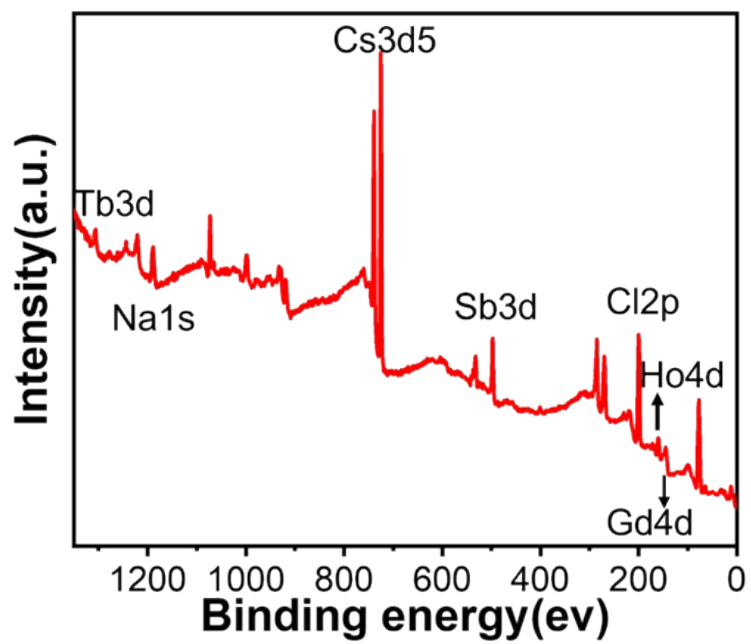

Figure S6. XPS spectra of Cs<sub>2</sub>NaGdCl<sub>6</sub>: 4%Sb<sup>3+</sup> 15% Tb<sup>3+</sup>.

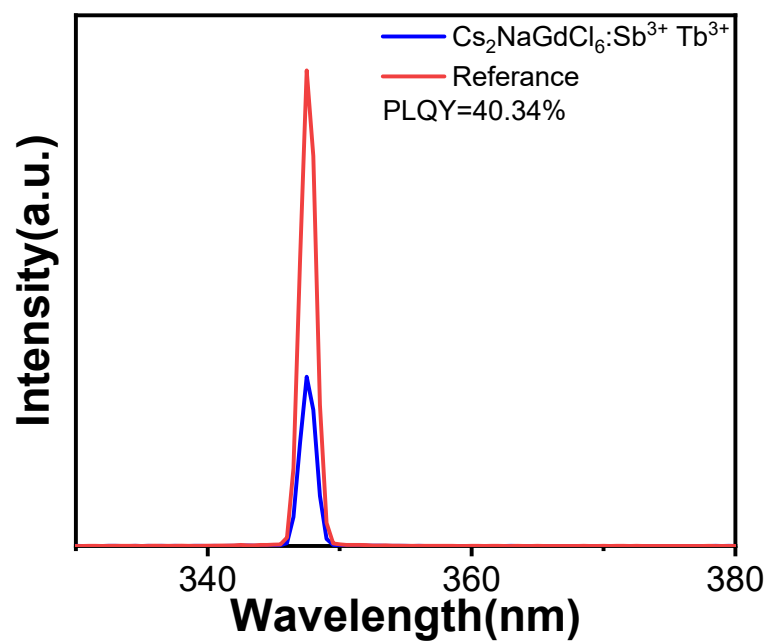

Figure S7. PLQY of  $\text{Cs}_2\text{NaGdCl}_6: 4\%\text{Sb}^{3+} 15\%\text{Tb}^{3+}$ .

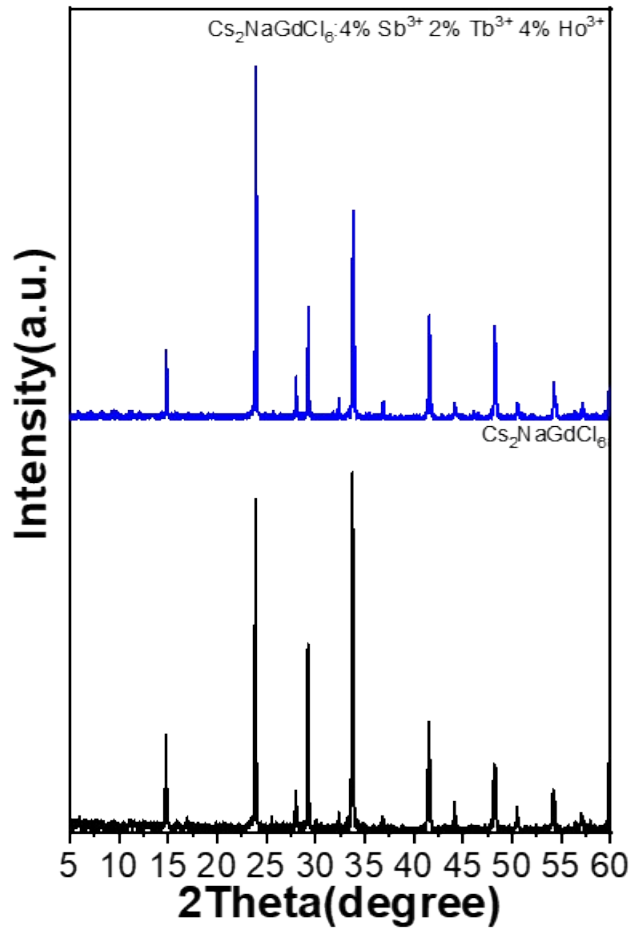

Figure S8. XRD comparison of  $\text{Cs}_2\text{NaGdCl}_6: 4\% \text{Sb}^{3+} 2\% \text{Tb}^{3+} 4\% \text{Ho}^{3+}$  and  $\text{Cs}_2\text{NaGdCl}_6$ .



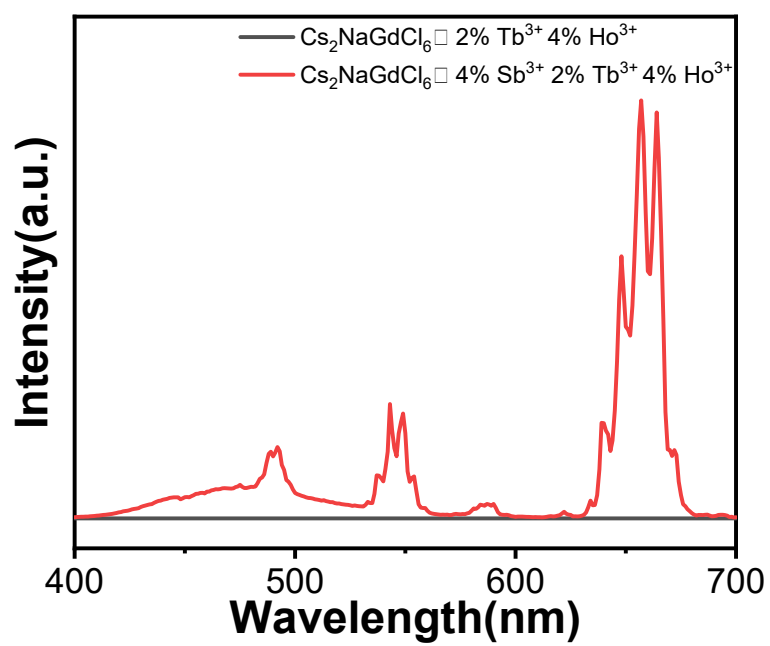

Figure S9. The emission spectra of Cs<sub>2</sub>NaGdCl<sub>6</sub>: 2%Tb<sup>3+</sup> 4%Ho<sup>3+</sup> doped Sb<sup>3+</sup> and undoped Sb<sup>3+</sup> under 365 nm excitation.

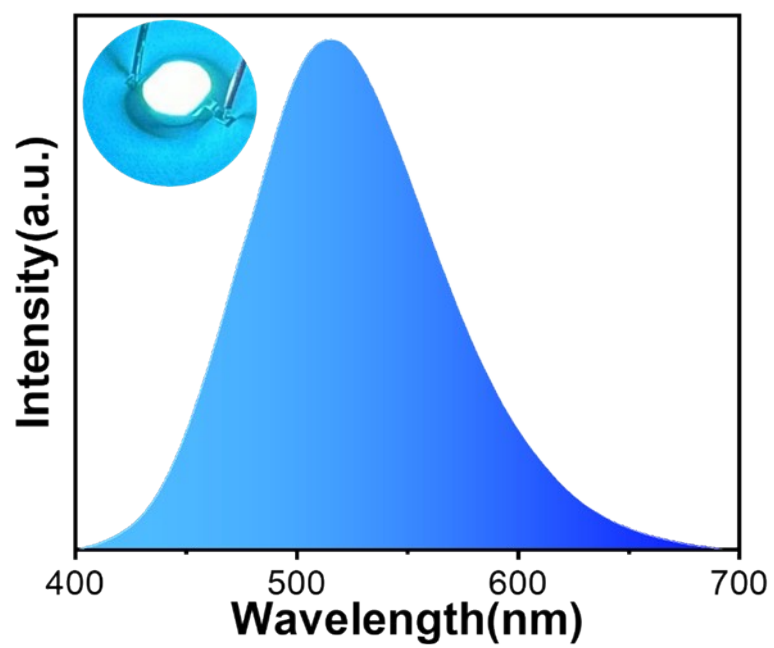

Figure S10. Electroluminescence spectra of Cs<sub>2</sub>NaGdCl<sub>6</sub>: 4%Sb<sup>3+</sup>.

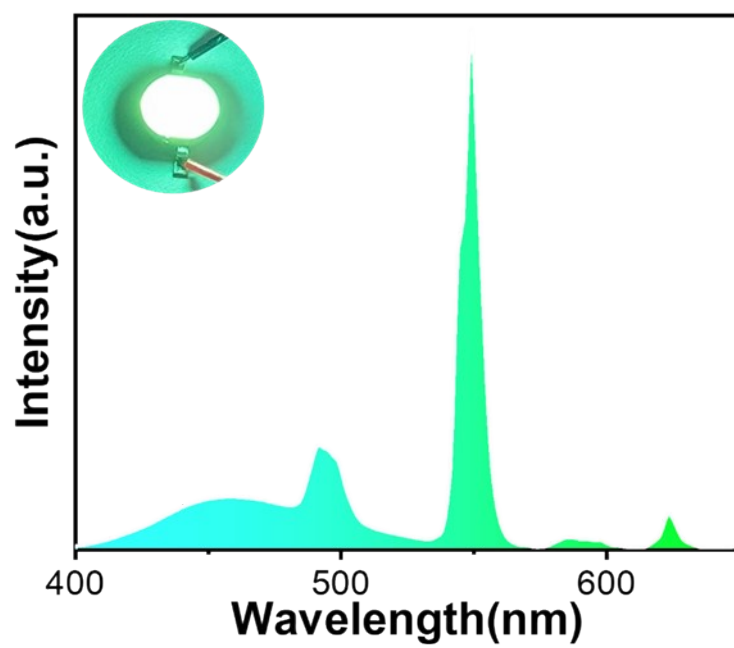

Figure S11. Electroluminescence spectra of Cs<sub>2</sub>NaGdCl<sub>6</sub>: 4%Sb<sup>3+</sup> 15%Tb<sup>3+</sup>.

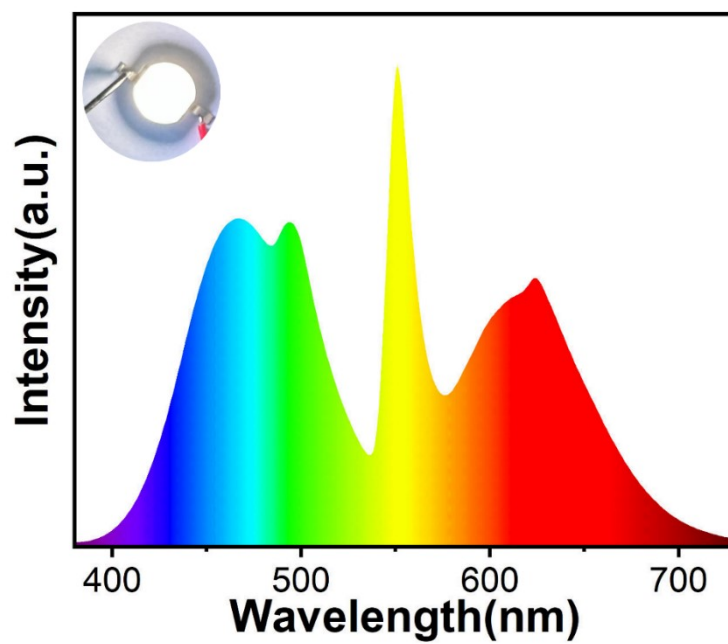

Figure S12. Electroluminescence spectra of  $\text{Cs}_2\text{NaGdCl}_6: 4\%\text{Sb}^{3+}$ ,  $\text{Cs}_2\text{NaGdCl}_6: 4\%\text{Sb}^{3+} 15\%\text{Tb}^{3+}$  and commercial red phosphors mixed into white phosphors.

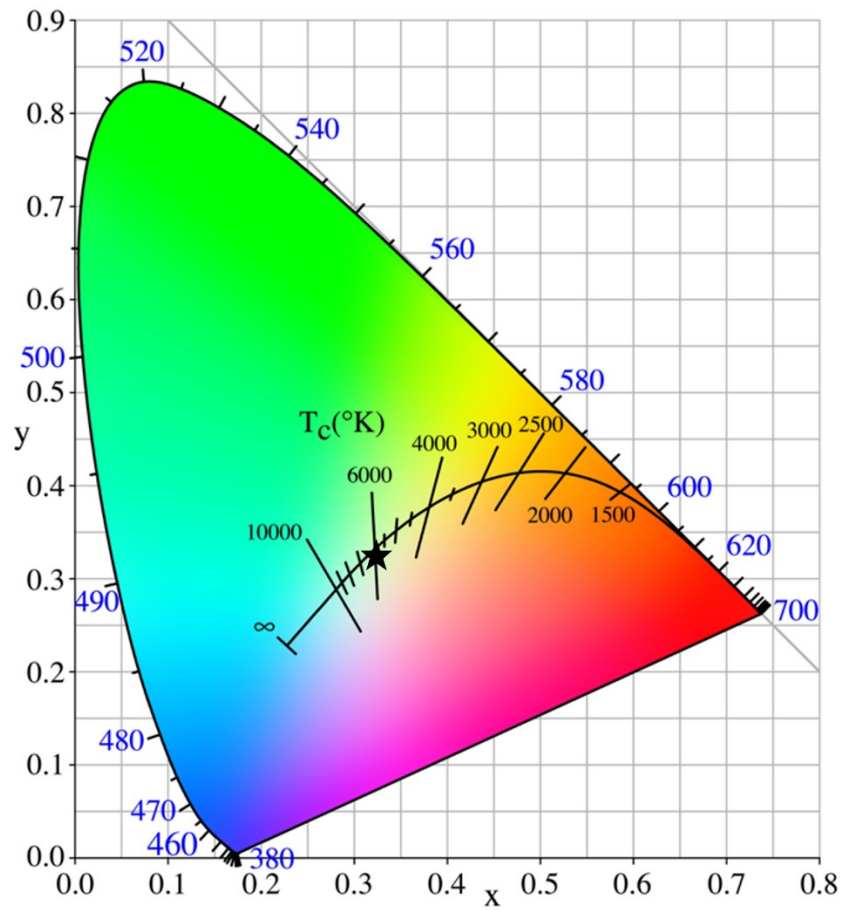

Figure S13. The CIE coordinates of  $\text{Cs}_2\text{NaGdCl}_6: 4\%\text{Sb}^{3+}$ ,  $\text{Cs}_2\text{NaGdCl}_6: 4\%\text{Sb}^{3+}$   $15\%\text{Tb}^{3+}$  and commercial red phosphors mixed into white phosphors.

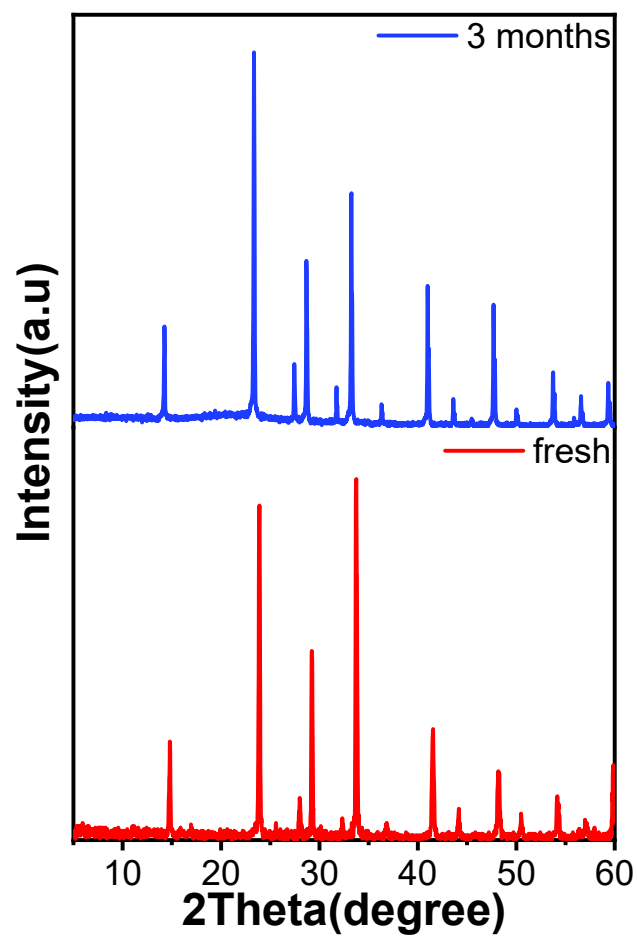

Figure S14. Comparison of initial XRD of  $\text{Cs}_2\text{NaGdCl}_6:4\%\text{Sb}^{3+} 2\%\text{Tb}^{3+} 4\%\text{Ho}^{3+}$  and XRD after three months.

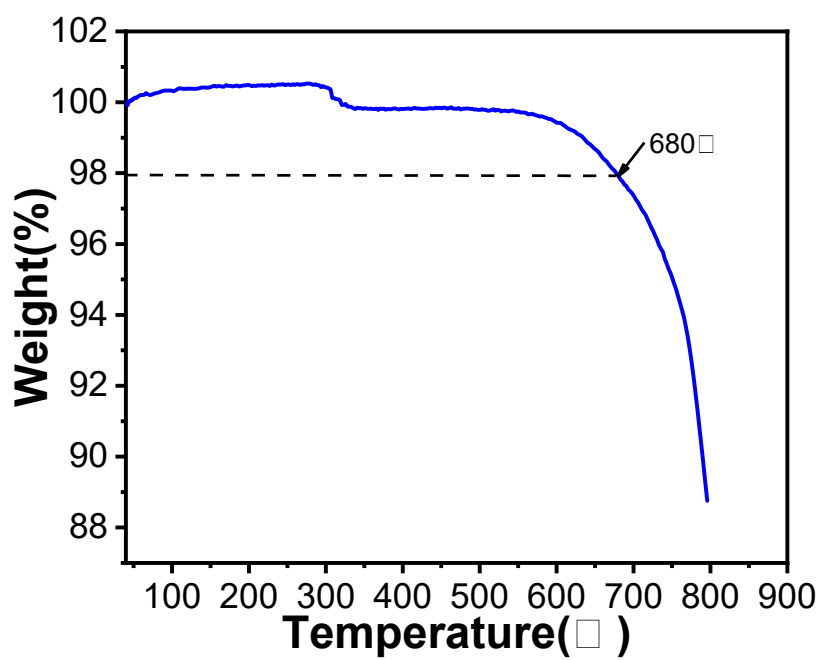

Figure S15. The thermogravimetric curve of  $\text{Cs}_2\text{NaGdCl}_6:4\%\text{Sb}^{3+} 2\%\text{Tb}^{3+} 4\%\text{Ho}^{3+}$ .

**Table S1.** Comparison of radius percentage difference ( $D_r$ ) between the doped Sb ion and matrix cation in the  $\text{Cs}_2\text{NaGdCl}_6$  crystal lattice.

| Ion type      | Ion              | Ion radius/ $\text{\AA}$ (CN=6) | $D_r/\%$ |
|---------------|------------------|---------------------------------|----------|
| Doped ion     | $\text{Sb}^{3+}$ | 0.760                           | --       |
| Matrix cation | $\text{Gd}^{3+}$ | 0.938                           | 18.0     |
| Matrix cation | $\text{Na}^+$    | 1.020                           | 25.0     |



**Table S2.** Comparison of radius percentage difference ( $D_r$ ) between the doped Ho ion and matrix cation in the  $\text{Cs}_2\text{NaGdCl}_6$  crystal lattice.

| Ion type      | Ion              | Ion radius/ $\text{\AA}$ (CN=6) | $D_r/\%$ |
|---------------|------------------|---------------------------------|----------|
| Doped ion     | $\text{Ho}^{3+}$ | 0.901                           | --       |
| Matrix cation | $\text{Gd}^{3+}$ | 0.938                           | 3.9      |
| Matrix cation | $\text{Na}^+$    | 1.020                           | 11.7     |

**Table S3.** Comparison of radius percentage difference ( $D_r$ ) between the doped Tb ion and matrix cation in the  $\text{Cs}_2\text{NaGdCl}_6$  crystal lattice.

| Ion type      | Ion              | Ion radius/ $\text{\AA}$ (CN=6) | $D_r/\%$ |
|---------------|------------------|---------------------------------|----------|
| Doped ion     | $\text{Tb}^{3+}$ | 0.923                           | --       |
| Matrix cation | $\text{Gd}^{3+}$ | 0.938                           | 1.6      |
| Matrix cation | $\text{Na}^+$    | 1.020                           | 9.5      |
